# Supplementary material for: Neuronal Ablation of CoA Synthase Causes Motor Deficits, Iron Dyshomeostasis, and Mitochondrial Dysfunctions in a CoPAN Mouse Model
Source: MDPI journal article supplement (doi:10.3390/ijms21249707), 2020-12-19
Supplement: s1 [file s1]

# Neuronal Ablation of CoA Synthase Causes Motor Deficits, Iron Dyshomeostasis and Mitochondrial Dysfunctions in a CoPAN Mouse Model

Ivano Di Meo, Chiara Cavestro, Silvia Pedretti, Tingting Fu, Simona Ligorio, Antonello Manocchio, Lucrezia Lavermicocca, Paolo Santambrogio, Maddalena Ripamonti, Sonia Levi, Sophie Ayciriex, Nico Mitro and Valeria Tiranti

## Supplementary figures and tables

Table of contents:

- **Supplementary Figure S1:** Syn1-Cre recombinase activity in brain.
- **Supplementary Figure S2:** Coasy protein in extra-cerebral organs.
- **Supplementary Figure S3:** Immunohistochemical analysis of astrocytes and microglia.
- **Supplementary Figure S4:** Ferritin quantification
- **Supplementary Figure S5:** Accumulation of Fe, Mg and Ca in Syn-Coasy mouse cortex.
- **Supplementary Figure S6:** Analysis of proteins involved in autophagy-lysosomes.
- **Supplementary Figure S7:** Analysis of lipoylated proteins.
- **Supplementary Figure S8:** Oxidative stress analysis.
- **Supplementary Figure S9:** Coasy targeting vector.
- **Supplementary Table S1:** List of PCR and qPCR primers.
- **Supplementary Table S2:** List of antibodies

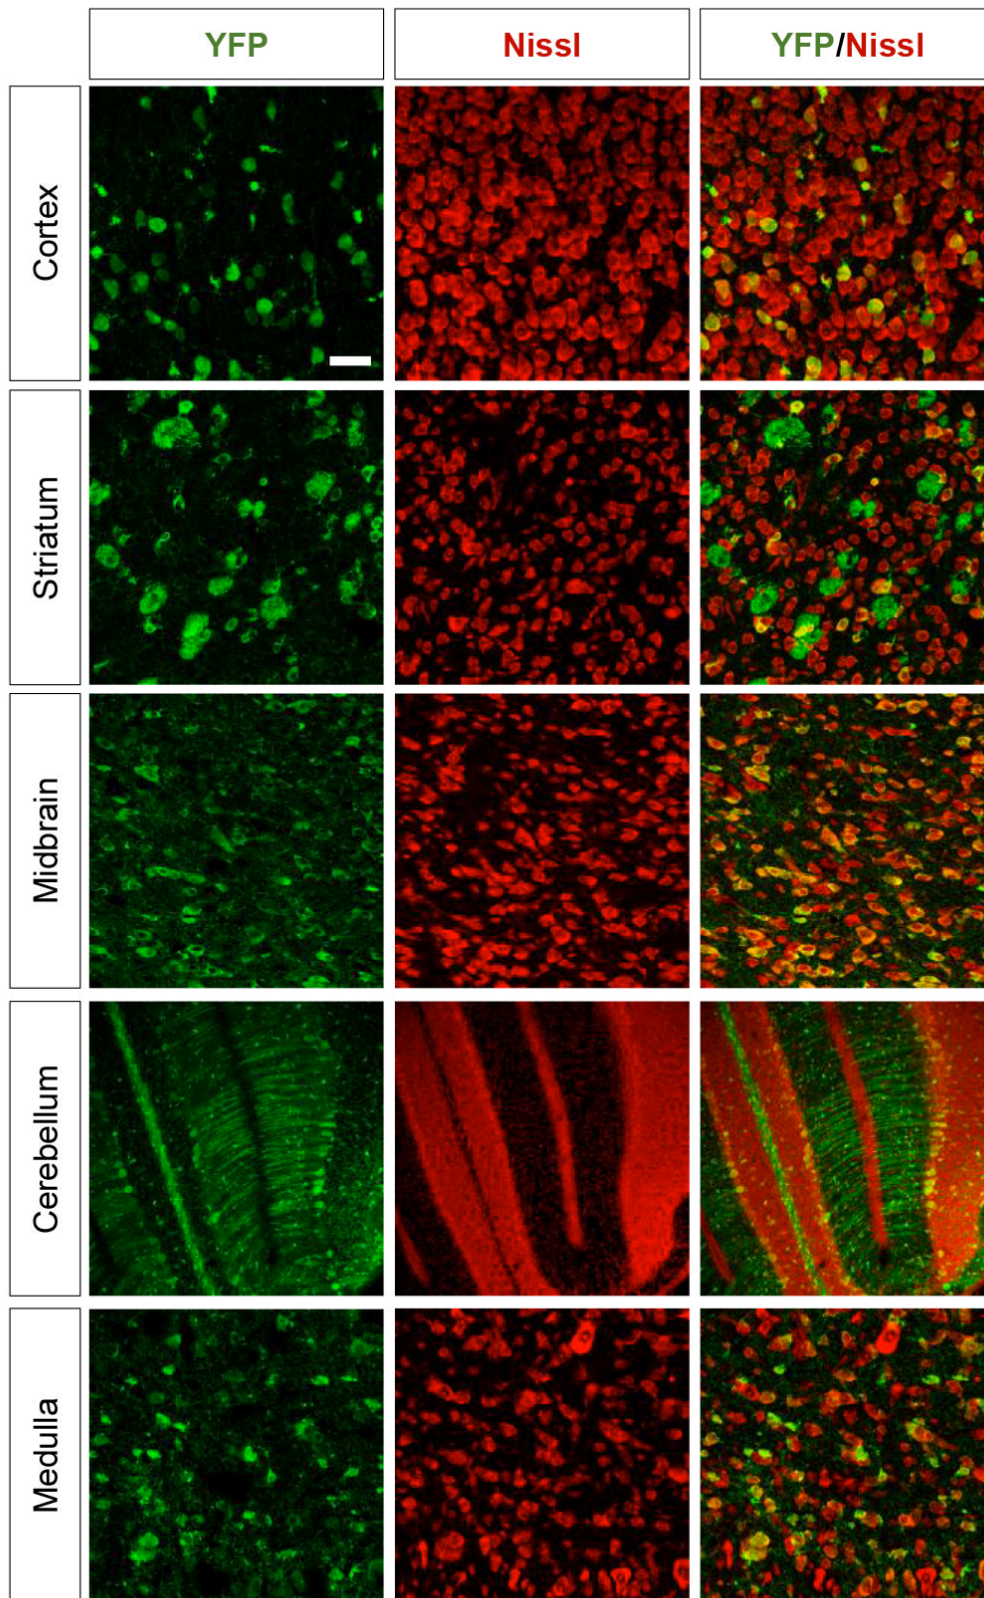

**Supplementary Figure S1.** Syn1-Cre recombinase activity in brain. Syn-Cre transgenic mouse was crossed with R26-stop-YFP reporter mice. Confocal immunofluorescence performed with a YFP antibody (green) and neuronal Nissl staining (red) showed Cre recombinase specifically activated in neurons through all the brain. Scale bar: 25  $\mu$ m.

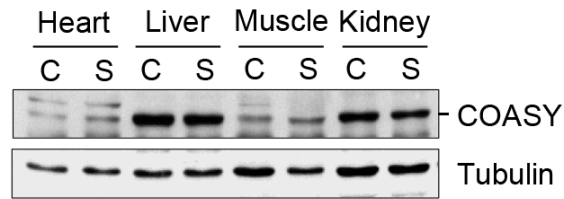

**Supplementary Figure S2:** Coasy protein in extra-cerebral organs. Western blot analysis of COASY protein in Ctrl (C) and Syn-Coasy (S) extra-CNS tissues.

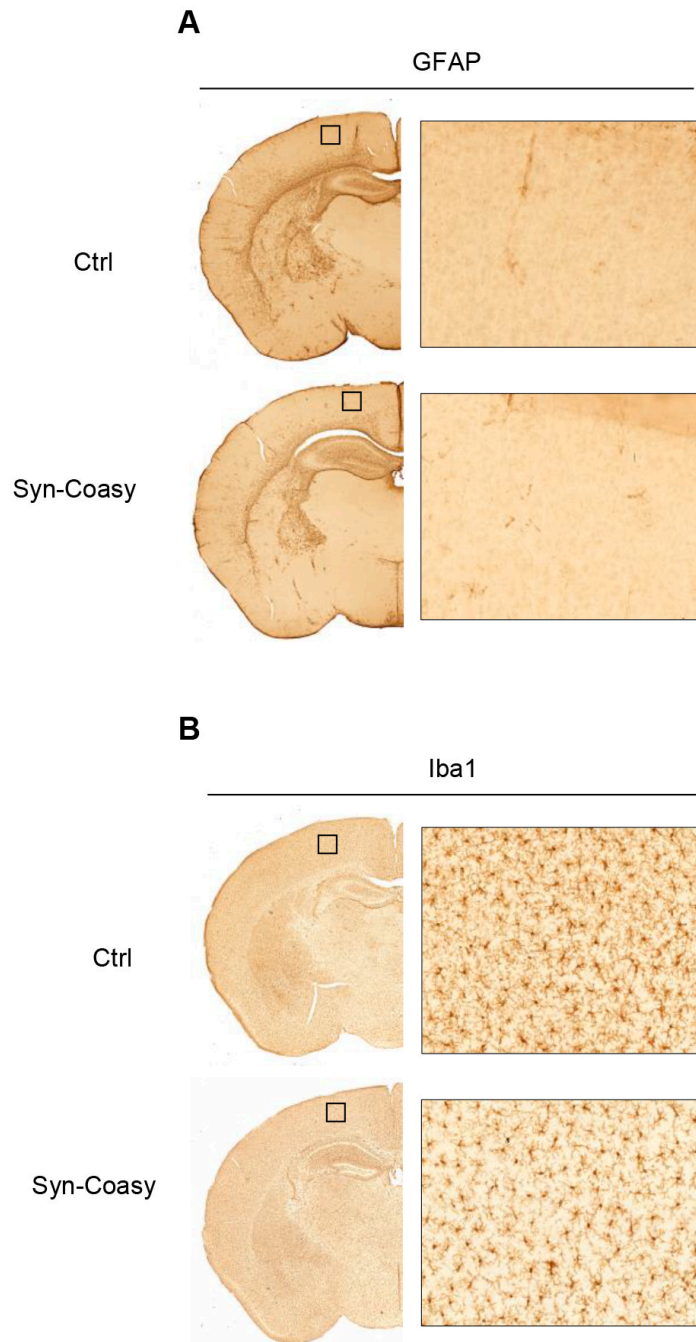

**Supplementary Figure S3.** Immunohistochemical analysis of astrocytes and microglia. Coronal sections immunolabeled with antibodies specific for (A) GFAP and (B) Iba1 showing absence of astrogliosis and neuroinflammation in Syn-Coasy brain (bottom panels) compared to control littermates (top panel).

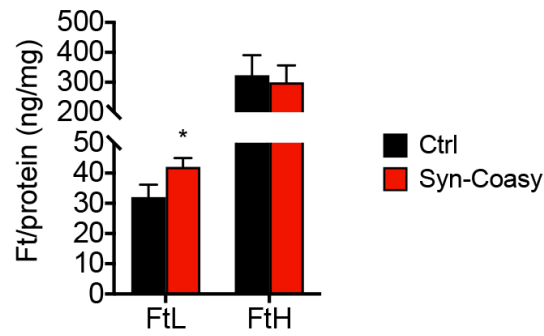

**Supplementary Figure S4:** Ferritin quantification. The soluble forebrain homogenate fractions of Syn-Coasy and Ctrl mice were analyzed for L- and H-ferritins (FtL and FtH, respectively) content by specific ELISA. Mean  $\pm$  SD is showed. \*  $p < 0.05$  (one-way ANOVA).

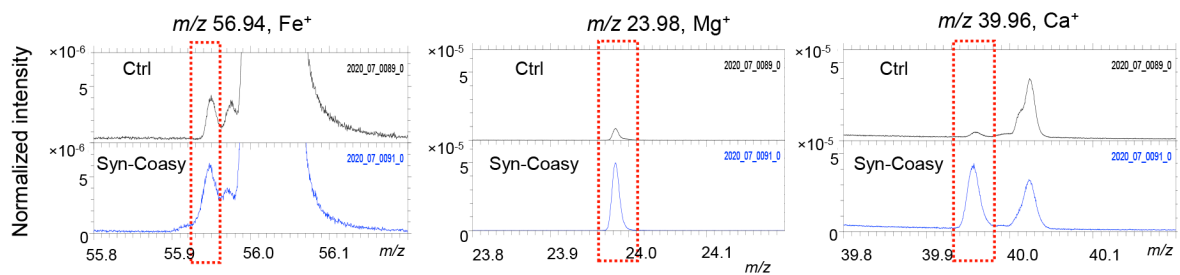

**Supplementary Figure S5:** Accumulation of Fe, Mg and Ca in Syn-Coasy mouse cortex. Mass spectra obtained from the cortex regions of control (Ctrl) and Syn-Coasy mice brain, showing the elevation of Fe, Mg and Ca in Syn-Coasy.

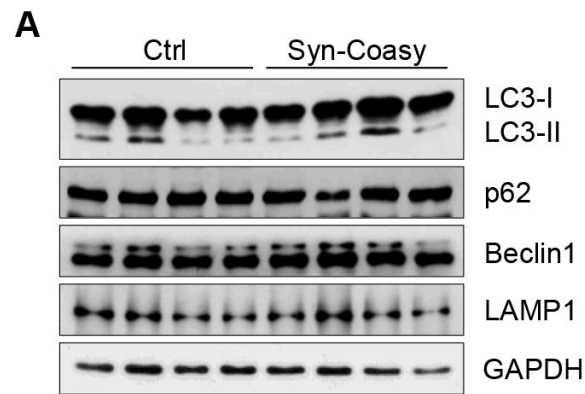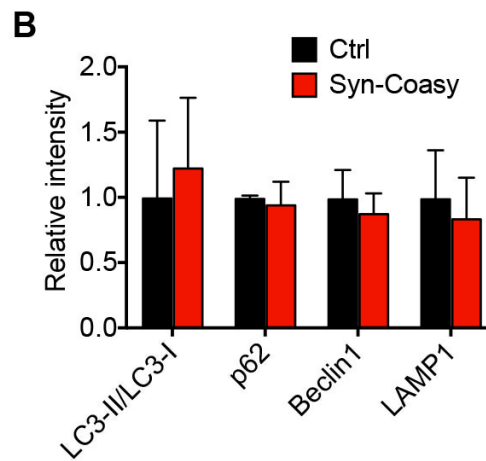

**Supplementary Figure S6.** Analysis of proteins involved in autophagy-lysosomes. (A) Western blot analysis and (B) densitometric quantification of proteins associated to autophagosomes and lysosomes in forebrain homogenates from Ctrl (n = 8) and Syn-Coasy (n = 8) mice. GAPDH was used as loading control. No statistically significant differences were observed (one-way ANOVA).

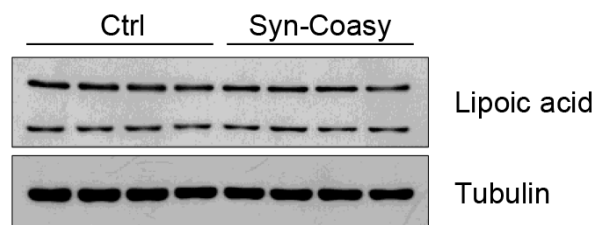

**Supplementary Figure S7.** Analysis of lipoylated proteins. Western blot analysis using an anti-lipoic acid antibody showing no differences in the level of lipoylated proteins in Syn-Coasy forebrain (n = 8) compared to control littermates (n = 8).

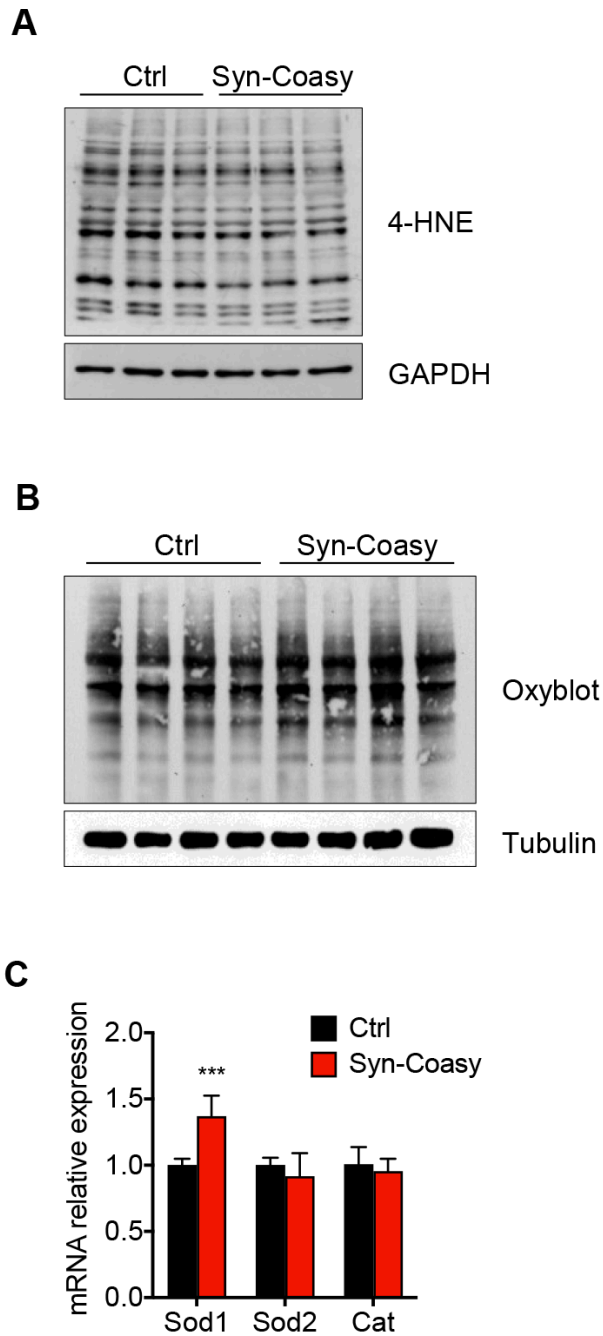

**Supplementary Figure S8.** Oxidative stress analysis. (A) 4-HNE immunoblot and (B) oxyblot analysis of forebrain lysates showed similar levels of both lipids and protein peroxidation in Syn-Coasy mice compared to control littermates. (C) Relative Sod1, Sod2 and Cat mRNA expression in Ctrl (n = 8) and Syn-Coasy (n = 8) mice forebrain. Mean  $\pm$  SD is showed. \*\*\*  $p < 0.001$  (one-way ANOVA).

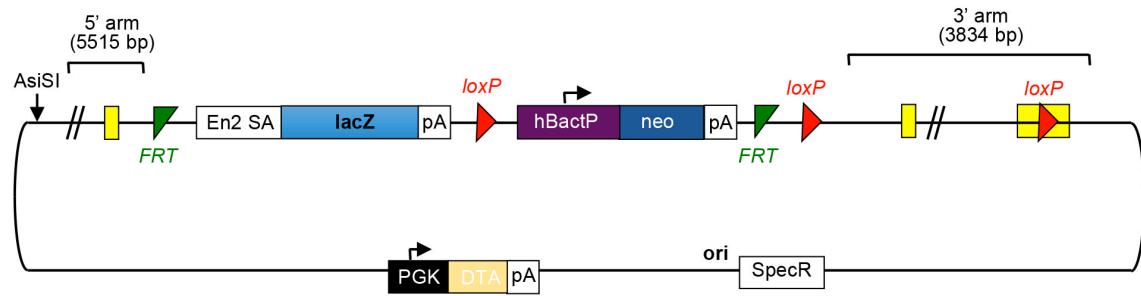

**Supplementary Figure S9.** Coasy targeting vector. Schematic representation of ETPG00282\_Y\_2\_E03 vector (EUCOMM) used for homologous recombination. The vector is composed by a cassette with the  $\beta$ -galactosidase (*lacZ*) reporter and the neomycin (*neo*) resistance gene under the control of mouse En2 and human  $\beta$ -actin promoter respectively, flanked by the Flpe recombinase-specific FRT sites (green). The cassette is designed to be inserted upstream Coasy exon 2. Cre-specific loxP sites are in red.

**Supplementary Table S1.** PCR and qPCR primers

| Use        | Gene           | Forward primer (5'- 3') | Reverse primer (5'- 3')  |
|------------|----------------|-------------------------|--------------------------|
| Genotyping | Coasy          | AGTTCTTGGGGGTTCTCCAC    | CTCGCCTCCACAGACAAGTT     |
| Genotyping | Cre            | CGCAGAACCTGAAGATGTTC    | GTTCGAACGCTAGAGCCTG      |
| DNA-qPCR   | Coasy          | ATCTAATGGTGAGGAGAA      | GAGGGTAATGAACTGATG       |
| RT-qPCR    | Coasy          | TGCTTCAGCCTCCAAATGA     | CTTTTCCCAGAGCCACTGAT     |
| RT-qPCR    | Pank1 $\alpha$ | GTTTCGCCCAGCATGATTCTC   | CTTAACCAGGGTTCACCGAT     |
| RT-qPCR    | Pank1 $\beta$  | CTGAGCCTAACTCCATTCAACT  | TCCACCGATATCCATACCAAAC   |
| RT-qPCR    | Pank2          | TTGGGCATACGTGGAGCTTT    | TCTCACATACATTTC AACAGGA  |
| RT-qPCR    | Pank3          | AACCTCCACCTGCACAAACT    | TGGGTAAGGATCATCCAGGT     |
| RT-qPCR    | Ppcs           | CTCTCAGTCCATTAGGCTCTTC  | GGATCTTGTGTT CAGGCATTTTC |
| RT-qPCR    | Ppcdc          | TAACAACAGAGAGAGCCAAACA  | GCTTCCACATCTCCCATTCA     |
| RT-qPCR    | Ftl            | TGAACCGCCTGGTCAACT      | CGGAAGAAGTGGCCTACG       |
| RT-qPCR    | Fth1           | TGGAGTTGTATGCCTCCTACG   | TGGAGAAAGTATTTGGCAAAGTT  |
| RT-qPCR    | Tfr1           | TCCTTTCCTTGCATATTCTGG   | CCAAATAAGGATAGTCTGCATCC  |
| RT-qPCR    | Dmt1           | CTCCACCATGACTGGAACCT    | TTCAGGAATCCCTCCATGAC     |
| RT-qPCR    | Fpn            | ACCCATCCCCATAGTCTCTGT   | ACCGTCAAATCAAAGGACCA     |
| RT-qPCR    | Sod1           | CAAGCGGTGAACCAGTTGTG    | TGAGGTCCTGCACTGGTAC      |
| RT-qPCR    | Sod2           | GCCTGCACTGAAGTTCAATG    | ATCTGTAAGCGACCTTGCTC     |
| RT-qPCR    | Cat            | TGGCACACTTTGACAGAGAGC   | CCTTTGCCTTGGAGTATCTGG    |

**Supplementary Table S2. Antibodies**

| Antibody    | Host animal | Dilution (WB) | Dilution (IHC/IF) | Source (Catalog #)       |
|-------------|-------------|---------------|-------------------|--------------------------|
| 4-HNE       | Rabbit      | 1:2000        |                   | Abcam (ab46545)          |
| acH3        | Rabbit      | 1:10000       |                   | Millipore (06-599)       |
| acLys       | Rabbit      | 1:1000        |                   | Cell Signaling (9441)    |
| acTUB       | Mouse       | 1:20000       |                   | Sigma-Aldrich (T7451)    |
| Beclin      | Rabbit      | 1:1000        |                   | Cell Signaling (3738)    |
| CB          | Mouse       |               | 1:5000            | Swant (300)              |
| COASY       | Rabbit      | 1:2000        |                   | ThermoFisher (PA5-28696) |
| CR          | Mouse       |               | 1:2000            | Swant (6B3)              |
| DMT1        | Rabbit      | 1:100         |                   | Santa Cruz (sc-166884)   |
| Fpn         | Rabbit      | 1:1000        |                   | Homemade[1]              |
| FtH         | Rabbit      | 1:1000        | 1:700             | Homemade[2]              |
| FtL         | Rabbit      | 1:1000        | 1:700             | Homemade[2]              |
| GAPDH       | Mouse       | 1:1000        |                   | Millipore (MAB374)       |
| GFAP        | Rabbit      |               | 1:1000            | Millipore (AB5804)       |
| GFP         | Rabbit      |               | 1:1000            | Abcam (ab290)            |
| Iba1        | Rabbit      |               | 1:1000            | Wako (019-19741)         |
| LAMP1       | Rabbit      | 1:1000        |                   | Sigma-Aldrich (L1418)    |
| LC3         | Rabbit      | 1:1000        |                   | Cell Signaling (2775)    |
| Lipoic acid | Rabbit      | 1:1000        |                   | Abcam (ab58724)          |
| NeuN        | Mouse       |               | 1:1000            | Millipore (MAB377)       |
| P62         | Rabbit      | 1:1000        |                   | Sigma-Aldrich (P0067)    |
| PV          | Mouse       |               | 1:5000            | Swant (PV235)            |
| TfR1        | Mouse       | 1:1000        |                   | ThermoFisher (13-6800)   |
| Tubulin     | Mouse       | 1:2000        |                   | Sigma-Aldrich (T0198)    |
